# Supplementary material for: Discrepancies in Serology-Based and Nucleic Acid-Based Detection and Quantitation of Tomato Spotted Wilt Orthotospovirus in Leaf and Root Tissues from Symptomatic and Asymptomatic Peanut Plants
Source: MDPI journal article supplement (doi:10.3390/pathogens10111476), 2021-11-12
Supplement: s1 [file s1]

## Discrepancies in Serology-Based and Nucleic Acid-Based Detection and Quantitation of Tomato Spotted Wilt Orthotospovirus in Leaf and Root Tissues from Symptomatic and Asymptomatic Peanut Plants

### RT-qPCR efficiency evaluation using a housekeeping gene

The efficiency of RT-qPCR for leaf and root tissue samples were evaluated by using a house keeping gene of peanut. Primers for alcohol dehydrogenase class III were used (forward: 5'- GACGCTTGGCGAGATCAACA-3'; reverse: 5'- AACCGGACAACCACCACATG -3'). RT-qPCR was conducted using the protocol described in the main manuscript. Two subsets of six asymptomatic plant samples (n = 12) from 2019 were used for RT-qPCR. Ct values for leaf and root tissue samples were reported in Table S1. Three technical replicates were used for each sample. Overall, RT-qPCR efficiency was lower in root tissue samples than leaf tissue samples as the mean Ct value was higher in root than leaf tissue samples by 5 cycles.

**Table S1.** Housekeeping gene (alcohol dehydrogenase class III) expression levels in root and leaf tissue samples from asymptomatic plants

| Subsets          | Asymptomatic plants | Ct             |                |
|------------------|---------------------|----------------|----------------|
|                  |                     | Root           | Leaf           |
| I                | 1                   | 27.5           | 24             |
|                  | 2                   | 28.8           | 23.5           |
|                  | 3                   | 27.8           | 25.4           |
|                  | 4                   | 28.6           | 26.8           |
|                  | 5                   | 28.8           | 23.7           |
|                  | 6                   | 32.8           | 25.2           |
| II               | 1                   | 30.5           | 23.2           |
|                  | 2                   | 31.9           | 25.3           |
|                  | 3                   | 29.9           | 23.7           |
|                  | 4                   | 28.3           | 25             |
|                  | 5                   | 31.7           | 27.6           |
|                  | 6                   | 34.1           | 24.3           |
| Mean ( $\pm$ SE) |                     | 30.1 $\pm$ 0.6 | 24.8 $\pm$ 0.4 |

**Table S2.** Summary of samples tested by DAS-ELISA, RT-PCR, and RT-qPCR for TSWV

| Sample type  | Year    | N  | tissue type | Number of positive |        |         | Percent positive |        |         |
|--------------|---------|----|-------------|--------------------|--------|---------|------------------|--------|---------|
|              |         |    |             | DAS-ELISA          | RT-PCR | RT-qPCR | DAS-ELISA        | RT-PCR | RT-qPCR |
| Symptomatic  | 2018    | 20 | Leaf        | 20                 | 19     | 20      | 100.00%          | 95.00% | 100.00% |
|              |         |    | Root        | 14                 | 10     | 15      | 70.00%           | 50.00% | 75.00%  |
|              | 2019    | 48 | Leaf        | 48                 | 42     | 46      | 100.00%          | 87.50% | 95.83%  |
|              |         |    | Root        | 42                 | 43     | 47      | 87.50%           | 89.58% | 97.92%  |
|              | Overall | 68 | Leaf        | 68                 | 61     | 66      | 100.00%          | 89.71% | 97.06%  |
|              |         |    | Root        | 56                 | 53     | 62      | 82.35%           | 77.94% | 91.18%  |
| Asymptomatic | 2018    | 9  | Leaf        | 7                  | 3      | 3       | 77.78%           | 33.33% | 33.33%  |
|              |         |    | Root        | 8                  | 0      | 1       | 88.89%           | 0.00%  | 11.11%  |
|              | 2019    | 42 | Leaf        | 5                  | 3      | 6       | 11.90%           | 7.14%  | 14.29%  |
|              |         |    | Root        | 38                 | 1      | 4       | 90.48%           | 2.38%  | 9.52%   |
|              | Overall | 51 | Leaf        | 12                 | 6      | 9       | 23.53%           | 11.76% | 17.65%  |
|              |         |    | Root        | 46                 | 1      | 5       | 90.20%           | 1.96%  | 9.80%   |
